# Supplementary material
Source: PubMed Central journal article supplement (PMC5728287)

Supplemental Table 1. MDS- and CVD-specific cause of death according to duration of survival from the time of MDS diagnosis, according to MDS risk group.

| MDS Risk Group | Time to Death   | Cause of Death |       |
|----------------|-----------------|----------------|-------|
|                |                 | MDS/Leukemia   | CVD   |
| High           | (0, 12] months  | 67.9%          | 8.4%  |
|                | (12, 36] months | 73.0%          | 7.3%  |
|                | (36, 60] months | 69.8%          | 9.9%  |
|                | >60 months      | 45.3%          | 18.9% |
| Intermediate   | (0, 12] months  | 48.8%          | 18.2% |
|                | (12, 36] months | 46.9%          | 19.4% |
|                | (36, 60] months | 39.6%          | 22.1% |
|                | >60 months      | 30.9%          | 25.9% |
| Low            | (0, 12] months  | 32.1%          | 23.0% |
|                | (12, 36] months | 32.6%          | 24.4% |
|                | (36, 60] months | 29.2%          | 26.0% |
|                | >60 months      | 24.4%          | 29.9% |

Supplemental Table 2: Cause of death reported according to the duration of survival after MDS diagnosis, within given MDS histologic subgroups, specifically analyzing patients with Del5q, and RARS (enriched for mutations in *SF3B1*).

|                 |            | COD          |       |      |       |       |       |
|-----------------|------------|--------------|-------|------|-------|-------|-------|
|                 |            | MDS/Leukemia |       | CVD  |       | Other |       |
|                 |            | N            | %     | N    | %     | N     | %     |
| Time to Death   |            |              |       |      |       |       |       |
| (0, 12] months  | del5q      | 100          | 59.17 | 25   | 14.79 | 44    | 26.04 |
|                 | RARS       | 134          | 33.75 | 93   | 23.43 | 170   | 42.82 |
|                 | All others | 4271         | 51.35 | 1371 | 16.48 | 2661  | 32.18 |
| (12, 36] months | del5q      | 103          | 57.54 | 33   | 18.44 | 43    | 24.02 |
|                 | RARS       | 175          | 35.28 | 116  | 23.39 | 205   | 41.33 |
|                 | All others | 3175         | 48.99 | 1171 | 18.07 | 2116  | 32.84 |
| (36, 60] months | del5q      | 44           | 53.01 | 10   | 12.05 | 29    | 34.94 |
|                 | RARS       | 124          | 35.23 | 91   | 25.85 | 137   | 38.92 |
|                 | All others | 1004         | 39.07 | 565  | 21.98 | 989   | 38.74 |
| >60 months      | del5q      | 23           | 41.07 | 12   | 21.43 | 21    | 37.50 |
|                 | RARS       | 117          | 31.97 | 107  | 29.23 | 142   | 38.80 |
|                 | All others | 578          | 28.56 | 539  | 26.63 | 898   | 44.72 |

Supplemental Figure 1: Percentage of deaths attributed to MDS/myeloid leukemia or to CVD according to MDS subtype. Patients with Del5q had more deaths attributed to MDS than patients with RARS or other MDS patients.

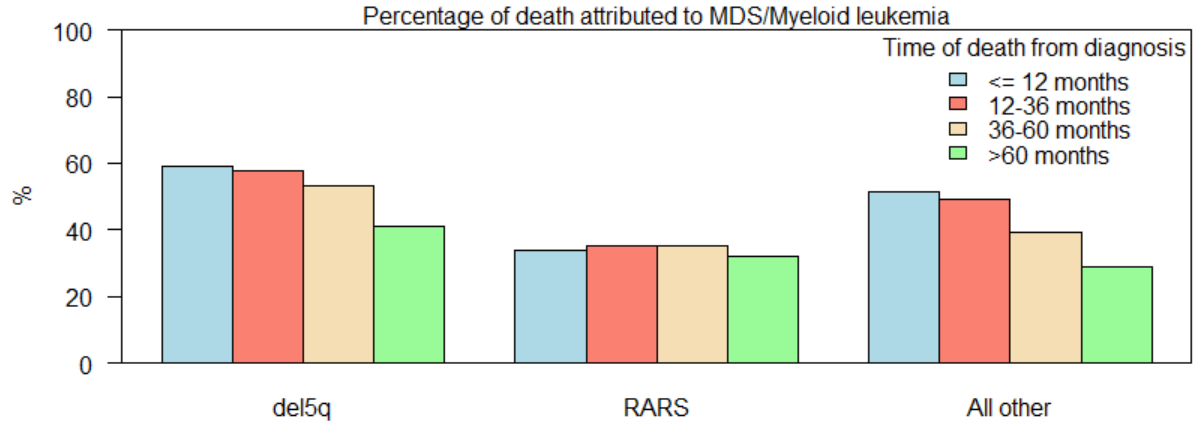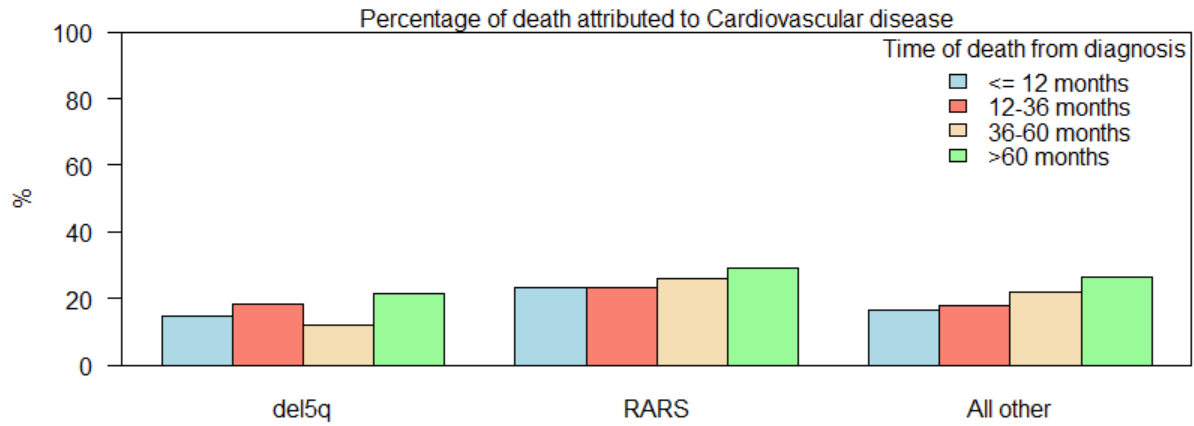

Supplement: ba010165-suppl1.pdf [file ba010165-suppl1.pdf]
